# Supplementary material
Source: Research Square preprint supplement (doi:10.21203/rs.3.rs-7728829/v1)
Supplement: Supplementary file 1 [file c78188ce3730e56e7e83d09a.docx]

**Online Resource for:**

European Child & Adolescent Psychiatry

Adolescents at the crossroads: genetic associations between psychotic symptoms and antisocial traits

Authors:

Natalia Tesli1,2, Piotr Jaholkowski2, Jaroslav Rokicki3,4, Andreas Jangmo5,Laoura Ziaka3, Viktoria Birkenæs2, Alexey Shadrin2, Martin Tesli6,7,8, Ole A. Andreassen2, Unn K Haukvik3,6

Affiliations:

1 Division of Mental Health Services, Akershus University Hospital, Lorenskog, Norway

2Centre for Precision Psychiatry, Division of Mental Health and Addiction, University of Oslo and Oslo University Hospital, Oslo, Norway

3Centre of Research and Education in Forensic Psychiatry, Oslo University Hospital, Oslo, Norway

4Department of Electronic Systems, Vilnius Gediminas Technical University, Vilnius, Lithuania

5Department of Chronic Diseases, Norwegian Institute of Public Health, Oslo, Norway

6Department of Mental Health and Addiction, Institute of Clinical Medicine, University of Oslo, Norway

7Division of Mental Health and Substance Abuse, Diakonhjemmet Hospital, Oslo, Norway

8Department of Mental Health, Norwegian Institute of Public Health, Oslo, Norway

Corresponding author:

Natalia Tesli, PhD

Email: natalia.tesli@ahus.no

Phone: +47 95520629

Division of Mental Health Services, Akershus University Hospital, Lorenskog, Norway

ORCID: 0000-0002-9263-3993

Table of Contents

[Figure 1. 3](#_Toc209877732)

[Note 1 3](#_Toc209877733)

[Note 2 4](#_Toc209877734)

[Genetic association analyses: results without transformations (raw sum scores on MoBa-questionnaires) 6](#_Toc209877735)

[Figure 2. 6](#_Toc209877736)

[Table 1. 6](#_Toc209877737)

[Figure 3. 8](#_Toc209877738)

[Table 2. 8](#_Toc209877739)

[Genetic associations: item-level logistic models 10](#_Toc209877740)

[Figure 4. Psychotic-like experiences. 11](#_Toc209877741)

[Table 3. Psychotic-like experiences. 12](#_Toc209877742)

[Figure 5. Psychopathy traits. 14](#_Toc209877743)

[Table 4. Psychopathy traits. 15](#_Toc209877744)

[Figure 6. Conduct disorder traits. 17](#_Toc209877745)

[Table 5. Conduct disorder traits. 18](#_Toc209877746)

[Figure 7. Oppositional-defiant disorder traits. 20](#_Toc209877747)

[Table 6. Oppositional-defiant disorder traits. 21](#_Toc209877748)

[References: 23](#_Toc209877749)

## Figure 1.


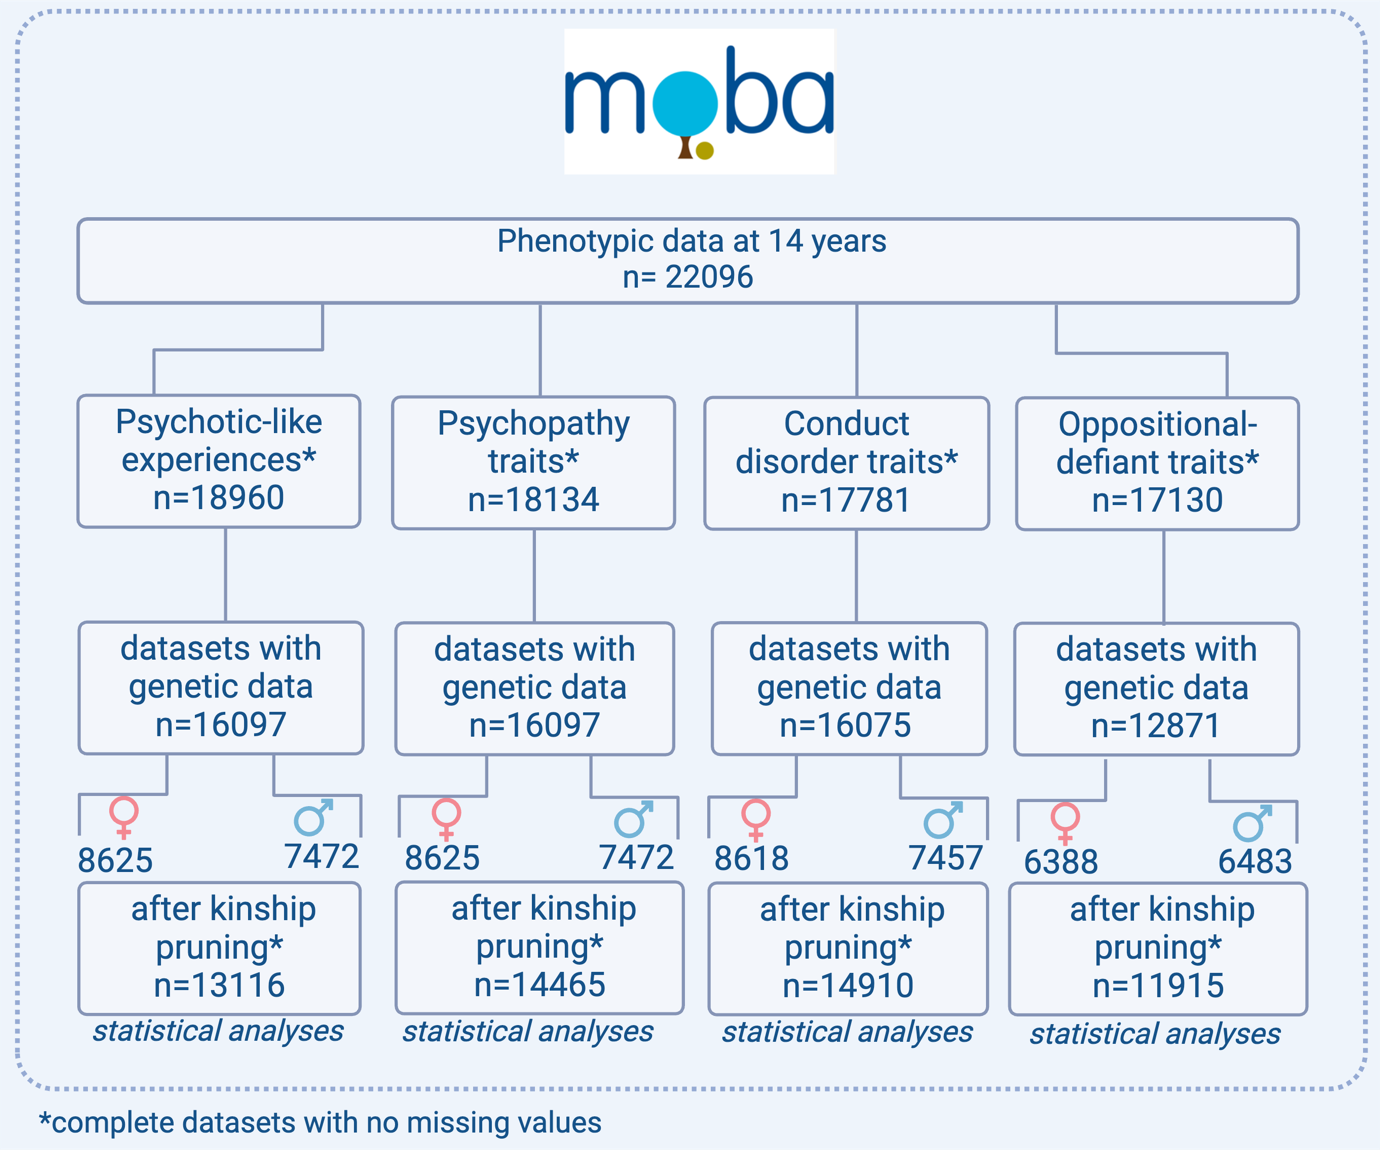


**Figure 1.** Participation flowchart for the genetic analyses with psychotic-like experiences (CAPE-16, frequency scale), psychopathy traits (Youth Psychopathic Traits Inventory-Short child version), conduct disorder and oppositional-defiant disorder traits (Parent/Teacher Rating Scale for Disruptive Behavior Disorders) from MoBa-questionnaires at 14 years

## **Note 1**

Blood samples obtained from umbilical cord were sent to the Norwegian Institute of Public Health for DNA extraction and storage (https://www.fhi.no/en/publ/2012/protocols-for-moba/). The genotyping of MoBa-cohort was conducted by several research projects (<https://github.com/folkehelseinstituttet/mobagen>). A novel family-based pipeline was implemented to account for the complex relatedness structure of MoBa cohort, with a concurrent control of the differences resulting from the array and batch effects (MoBaPsychGen genotype quality control pipeline[1]).

The MoBaPsychGen pipeline (https://github.com/psychgen/MoBaPsychGen-QC-pipeline) includes preimputation quality control (QC), phasing, imputation, and post-imputation QC and prioritizes retaining individuals over SNPs. The analysis was restricted to the individuals of European ancestry selected based on the visual comparison of the first seven genetic principal components (PC) with PCs from 1000 Genomes phase 1 unrelated samples, as described previously. Further, to control for population stratification with selected sample, we included top 10 PCs as covariates in all regression analyses. We controlled for genetic relatedness by excluding individuals with a first or second-degree relatives in the given sample (with i.e., kinship coefficient ≥0.125 as described by Pillinger et al. [2].

## **Note 2**

Positive psychotic-like symptoms from the MoBa-questionnaire were defined by self-report responses at 14 years. The questions were based on previously validated CAPE-15 measure (Community Assessment of Psychic Experiences) [3]. The present questionnaire contains 16 questions in total, 15 from CAPE-15 measure and 1 from CAPE-9 [4] measure. It has recently been validated in the MoBA data by our research group [5]. The selected items consist of questions related to 3 factors on positive psychotic symptom scale: persecutory ideation, bizarre experiences, and perceptual abnormalities. Each item is endorsed on two 4-point scales: the first scale is related to the frequency of a given experience (never, sometimes, often, nearly always) and the second scale is related to the degree of distress. As there were many missing values on the second scale, the analyses were confined to the first scale, i.e., frequency of a given symptom/experience. The scale included the following questions: *[UB252]* *Do you ever feel as if things in magazines or on TV were written especially for you?; [UB254] Do you ever feel as if you are being persecuted in any way?; [UB256]* *Do you ever feel as if there is a conspiracy against you?; [UB258]* *Do you ever feel as if electrical devices can influence the way you think?; [UB260]* *Do you ever feel as if the thoughts in your head are not your own?; [UB262]* *Have your thoughts ever been so vivid that you were worried other people would hear them?; [UB264]* *Do you ever feel as if you are under the control of some force or power other than yourself?; [UB266]* *Do you ever hear voices when you are alone (not radio or TV)?; [UB268]* *Do you ever see objects, people or animals that other people cannot see?; [UB270]* *Have you ever had the feeling as if people drop hint about you, or say things with a double meaning?; [UB272]* *Do you ever feel as if some people are not what they seem to be?; [UB274]* *Do you ever feel that people look at you oddly because of your appearance?; [UB276]* *Have you ever felt as if the thoughts in your head are being taken away from you?; [UB278] Do you ever feel as if your own thoughts were being echoed back to you?; [UB280]* *Do you ever hear voices talking to each other when you are alone?; [UB282] Have you ever felt as if a double has taken the place of a family member, a friend or an acquaintance?*

Psychopathy traits were measured with Youth psychopathic traits questionnaire consisting of selective items from the Youth Psychopathic Traits Inventory-Child version [6]. The questionnaire used in the present study included the following questions: *[UB155] It’s easy for me to make other people do things that suit me well; [UB156] I can fool others by acting extra nice and sweet; [UB157] I am good at getting people to believe in what I make up; [UB158] It’s weak to feel guilty when you have hurt others; [UB159] It’s weak to feel nervous or worried; [UB160] Feelings are less important to me than they are for others; [UB161] It often happens that I do things without thinking ahead; [UB162] It often happens that I talk first and think later; [UB163] I think of myself as someone who does things suddenly; [UB164] I get angry at myself when I make mistakes; [UB165] I get upset when there is a single mistake in my work.*

Conduct disorder traits were defined by self-report based on 8 selected items from Parent/Teacher Rating Scale for Disruptive Behaviour Disorders (RS-DBD) [7]. Each item was rated on a 6-point Likert scale from 1(never/rarely), 2 (1 time), 3 (2-4 times), 4 (5-10 times), 5 (11-20) times, to 6 (more than 20 times). The choice of 6-point scale in comparison with 4-point scale in the original RS-DBD instrument was motivated by obtaining a large variance of responses. The present study included the following questions: *[UB127] Bullied, threatened or intimidated others; [UB128]* *Initiated physical fights; [UB129]* *Been physically cruel to others; [UB130]* *Harassed or injured animals physically; [UB131]* *Stolen items of nontrivial value without confronting a victim (e.g. shoplifting); [UB132]* *Deliberately destroyed other’s property; [UB133] Been truant from school; [UB134]* *Used an object that can cause serious physical harm to others (e.g. a bat, stone, knife, heavy toy).* Questions from the original RS-DBD scale which were not age-appropriate, such as *has forced someoen into sexual activity* were removed from the current scale.

Oppositional-defiant disorder traits were defined by mothers’ responses based on 8 selected items from Parent/Teacher Rating Scale for Disruptive Behaviour Disorders (RS-DBD)[7]. Each item was rated on a 4-point Likert scale from 1(never/rarely), 2 (sometimes), 3 (often), to 4 (very often). The present study included the following questions: *[UM170] Loses temper (tantrums); [UM171] Argues with adults; [UM172] Actively defies or refuses to comply with adults’ requests or rules; [UM173] Deliberately annoys people; [UM174] Blames others for his/her mistakes or misbehavior; [UM175] Is touchy or easily annoyed by others [UM176] Is angry and resentful; [UM177] Is spiteful or vindictive.*

The complete documentation for study protocol at 14-years can be found here: <https://www.fhi.no/globalassets/dokumenterfiler/studier/den-norske-mor-far-og-barn--undersokelsenmoba/instrumentdokumentasjon/instrument-documentation-q14_barn.pdf> (instrument documentation for youth) and here: <https://www.fhi.no/globalassets/dokumenterfiler/studier/den-norske-mor-far-og-barn--undersokelsenmoba/instrumentdokumentasjon/instrument-documentation-q14_mor.pdf> (instrument documentation for mothers).

# **Genetic association analyses: results without transformations (raw sum scores on MoBa-questionnaires)**

## **Figure 2.**


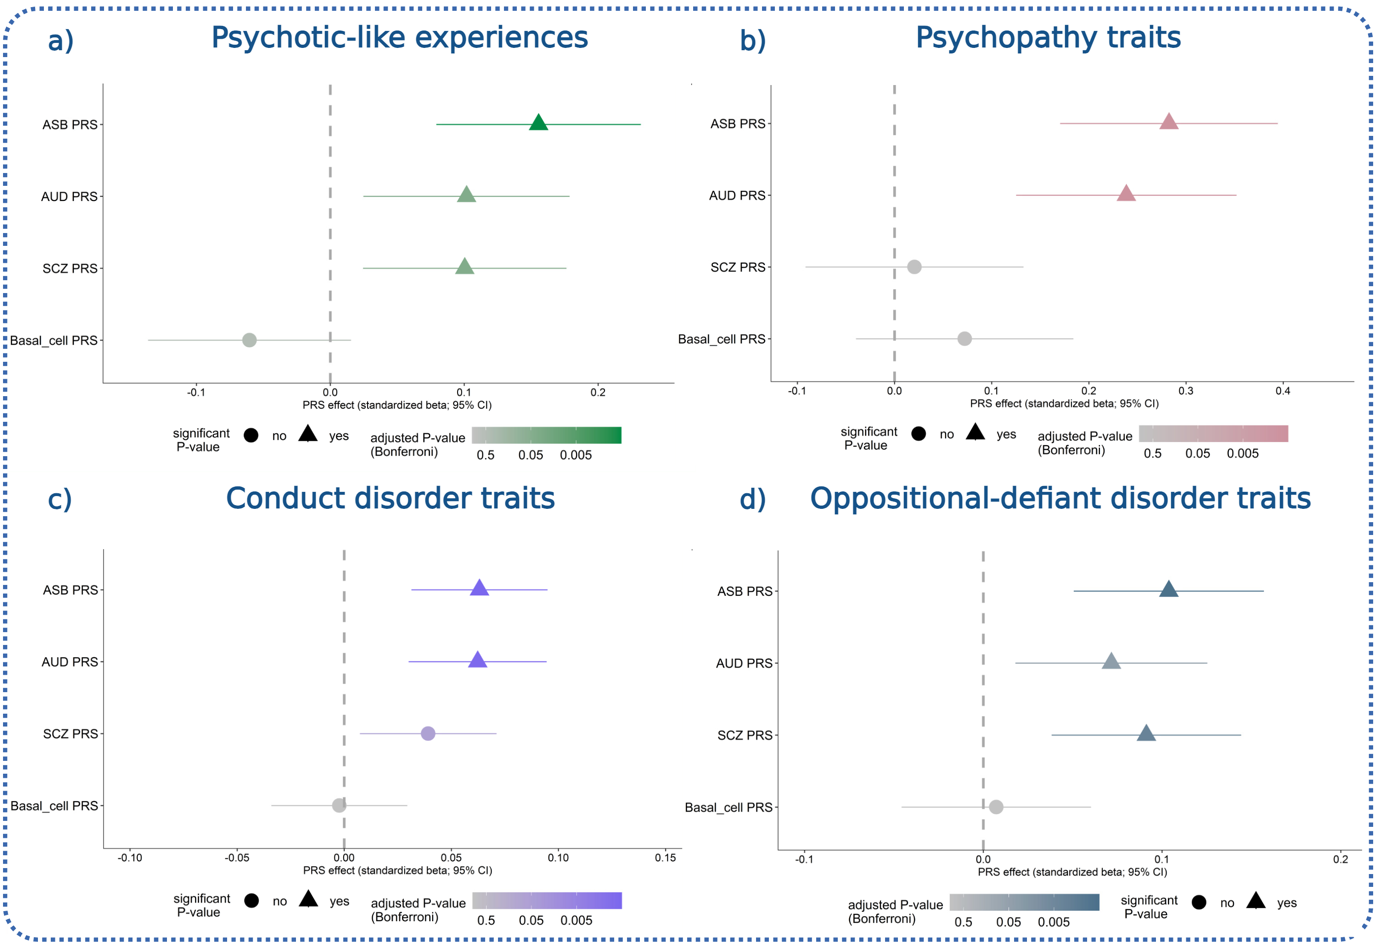


**Figure 2.** Associations between polygenic risk scores for schizophrenia (SCZ), antisocial behaviour (ASB), alcohol use disorder (AUD), basal cell carcinoma and psychotic-like symptoms (a), psychopathy traits (b), conduct disorder traits (c), and oppositional-definat traits (d). PRS polygenic risk score. Error bars represent the 95% confidence intervals for the estimate value. The vertical line represents an effect estimate equal to zero. All p-values corrected with Bonferroni for multiple testing for each outcome separately

## **Table 1.**

| Psychotic-like experiences (CAPE-16) | | | |
| --- | --- | --- | --- |
| Polygenic score | PRS effect (*β-*value) | 95% Confidence interval | *p*-value |
| PRS SCZ | 0.10 | 0.02-0.17 | 0.038 |
| PRS ASB | 0.15 | 0.07-0.23 | 0.0002 |
| PRS AUD | 0.10 | 0.02-0.17 | 0.03 |
| PRS basal cell | -0.06 | -0.13-0.15 | 0.47 |
| Psychopathy traits (YPI-CV) | | | |
| Polygenic score | PRS effect (*β*-value) | 95% Confidence interval | *p*-value |
| PRS SCZ | 0.02 | -0.09-0.13 | 0.99 |
| PRS ASB | 0.28 | 0.17-0.39 | 3.15 × 10-6 |
| PRS AUD | 0.23 | 0.12-0.35 | 1.5 × 10-4 |
| PRS basal cell | 0.07 | -0.03-018 | 0.82 |
| Conduct disorder traits (RS-DBD) | | | |
| Polygenic score | PRS effect (*β*-value) | 95% Confidence interval | *p*-value |
| PRS SCZ | 0.03 | 0.007- 0.07 | 0.06 |
| PRS ASB | 0.06 | 0.03-0.09 | 0.0003 |
| PRS AUD | 0.06 | 0.03-0.09 | 0.0006 |
| PRS basal cell | -0.002 | -0.03-0.02 | 1 |
| Oppositional-defiant disorder traits (RS-DBD) | | | |
| Polygenic score | PRS effect (*β*-value) | 95% Confidence interval | *p*-value |
| PRS SCZ | 0.09 | 0.03-0.14 | 0.003 |
| PRS ASB | 0.10 | 0.05-0.15 | 0.0005 |
| PRS AUD | 0.07 | 0.01-0.12 | 0.03 |
| PRS basal cell | 0.007 | -0.04-0.06 | 1 |

**Table 1.** Associations between polygenic risk scores for schizophrenia (SCZ), antisocial behaviour (ASB), alcohol use disorder (AUD), basal cell carcinoma and psychotic-like symptoms, psychopathy traits, conduct disorder traits, and oppositional-definat traits. PRS polygenic risk score. All p-values corrected with Bonferroni for multiple testing for each outcome separately.

## **Figure 3.**


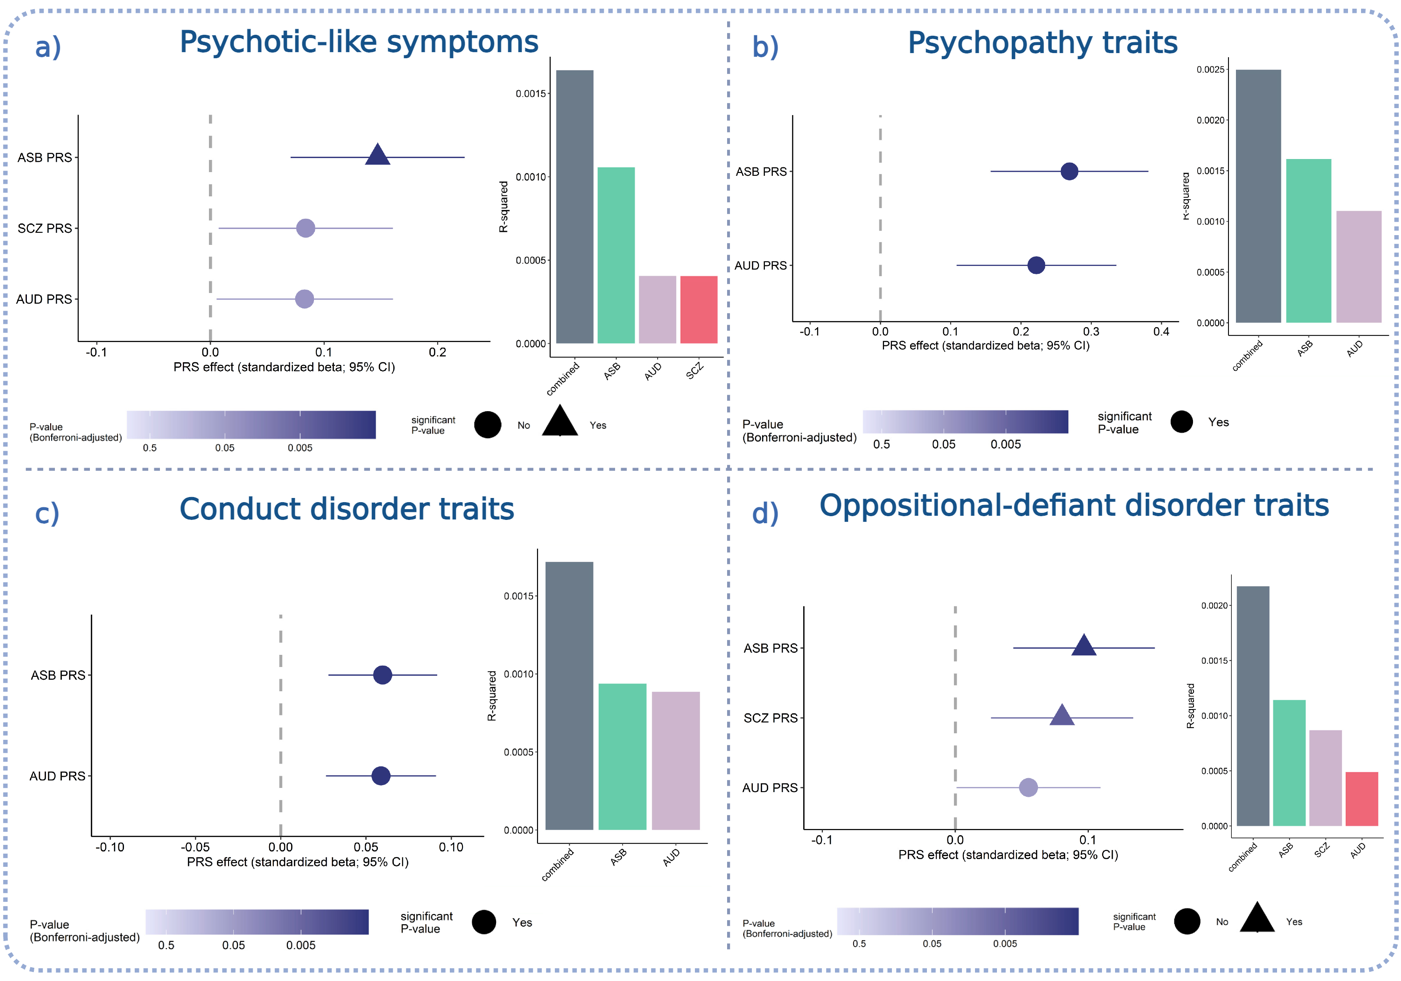


**Figure 3.** Multivariable linear regression models for the associations between psychotic-like symptoms (a); psychopathy traits (b); conduct disorder traits (c), oppositional-defiant disorder traits (d) and polygenic risk scores. ASB antisocial behaviour; SCZ schizophrenia; AUD alcohol use disorder; PRS polygenic score. Error bars represent the 95% confidence intervals of the estimate value. The vertical line represents an effect estimate equal to zero. R-squared is calcuated from linear regression models for the associations between the phenotypes and PRSs. All p-values corrected with Bonferroni for multiple testing for each outcome separately.

## **Table 2.**

| Psychotic-like experiences (CAPE-16) | | | | |
| --- | --- | --- | --- | --- |
| Polygenic score | PRS effect (*β*-value) | 95% Confidence interval | *p*-value | *R2* |
| PRS SCZ | 0.08 | 0.007-0.16 | 0.09 | 0.0004 |
| PRS ASB | 0.14 | 0.07-0.22 | 0.0003 | 0.001 |
| PRS AUD | 0.08 | 0.005-0.16 | 0.09 | 0.0004 |
| PRS-combined |  |  |  | 0.0016 |
| Psychopathy traits (YPI-CV) | | | | |
| Polygenic score | PRS effect (*β*-value) | 95% Confidence interval | *p*-value | *R2* |
| PRS ASB | 0.26 | 0.15-0.38 | 2.64 × 10-6 | 0.0016 |
| PRS AUD | 0.22 | 0.10-0.33 | 0.0002 | 0.0011 |
| PRS-combined |  |  |  | 0.0024 |
| Conduct disorder traits (RS-DBD) | | | | |
| Polygenic score | PRS effect (*β*-value) | 95% Confidence interval | *p*-value | *R2* |
| PRS ASB | 0.059 | 0.027-0.091 | 0.0004 | 0.0009 |
| PRS AUD | 0.058 | 0.026-0.091 | 0.0006 | 0.0008 |
| PRS-combined |  |  |  | 0.0017 |
| Oppositional-defiant disorder traits (RS-DBD) | | | | |
| Polygenic score | PRS effect (*β*-value) | 95% Confidence interval | *p*-value | *R2* |
| PRS SCZ | 0.08 | 0.02-0.13 | 0.009 | 0.0008 |
| PRS ASB | 0.09 | 0.04-0.15 | 0.0009 | 0.0011 |
| PRS AUD | 0.05 | 0.001-0.10 | 0.12 | 0.0004 |
| PRS-combined |  |  |  | 0.0021 |

**Table 2.** Multivariable linear regression models for the associations between psychotic-like symptoms; psychopathy traits; conduct disorder traits, oppositional-defiant disorder traits and polygenic risk scores. ASB antisocial behaviour; SCZ schizophrenia; AUD alcohol use disorder; PRS polygenic score. R-squared is calcuated from linear regression models for the associations between the phenotypes and PRSs.

# **Genetic associations: item-level logistic models**

## **Figure 4. Psychotic-like experiences.**


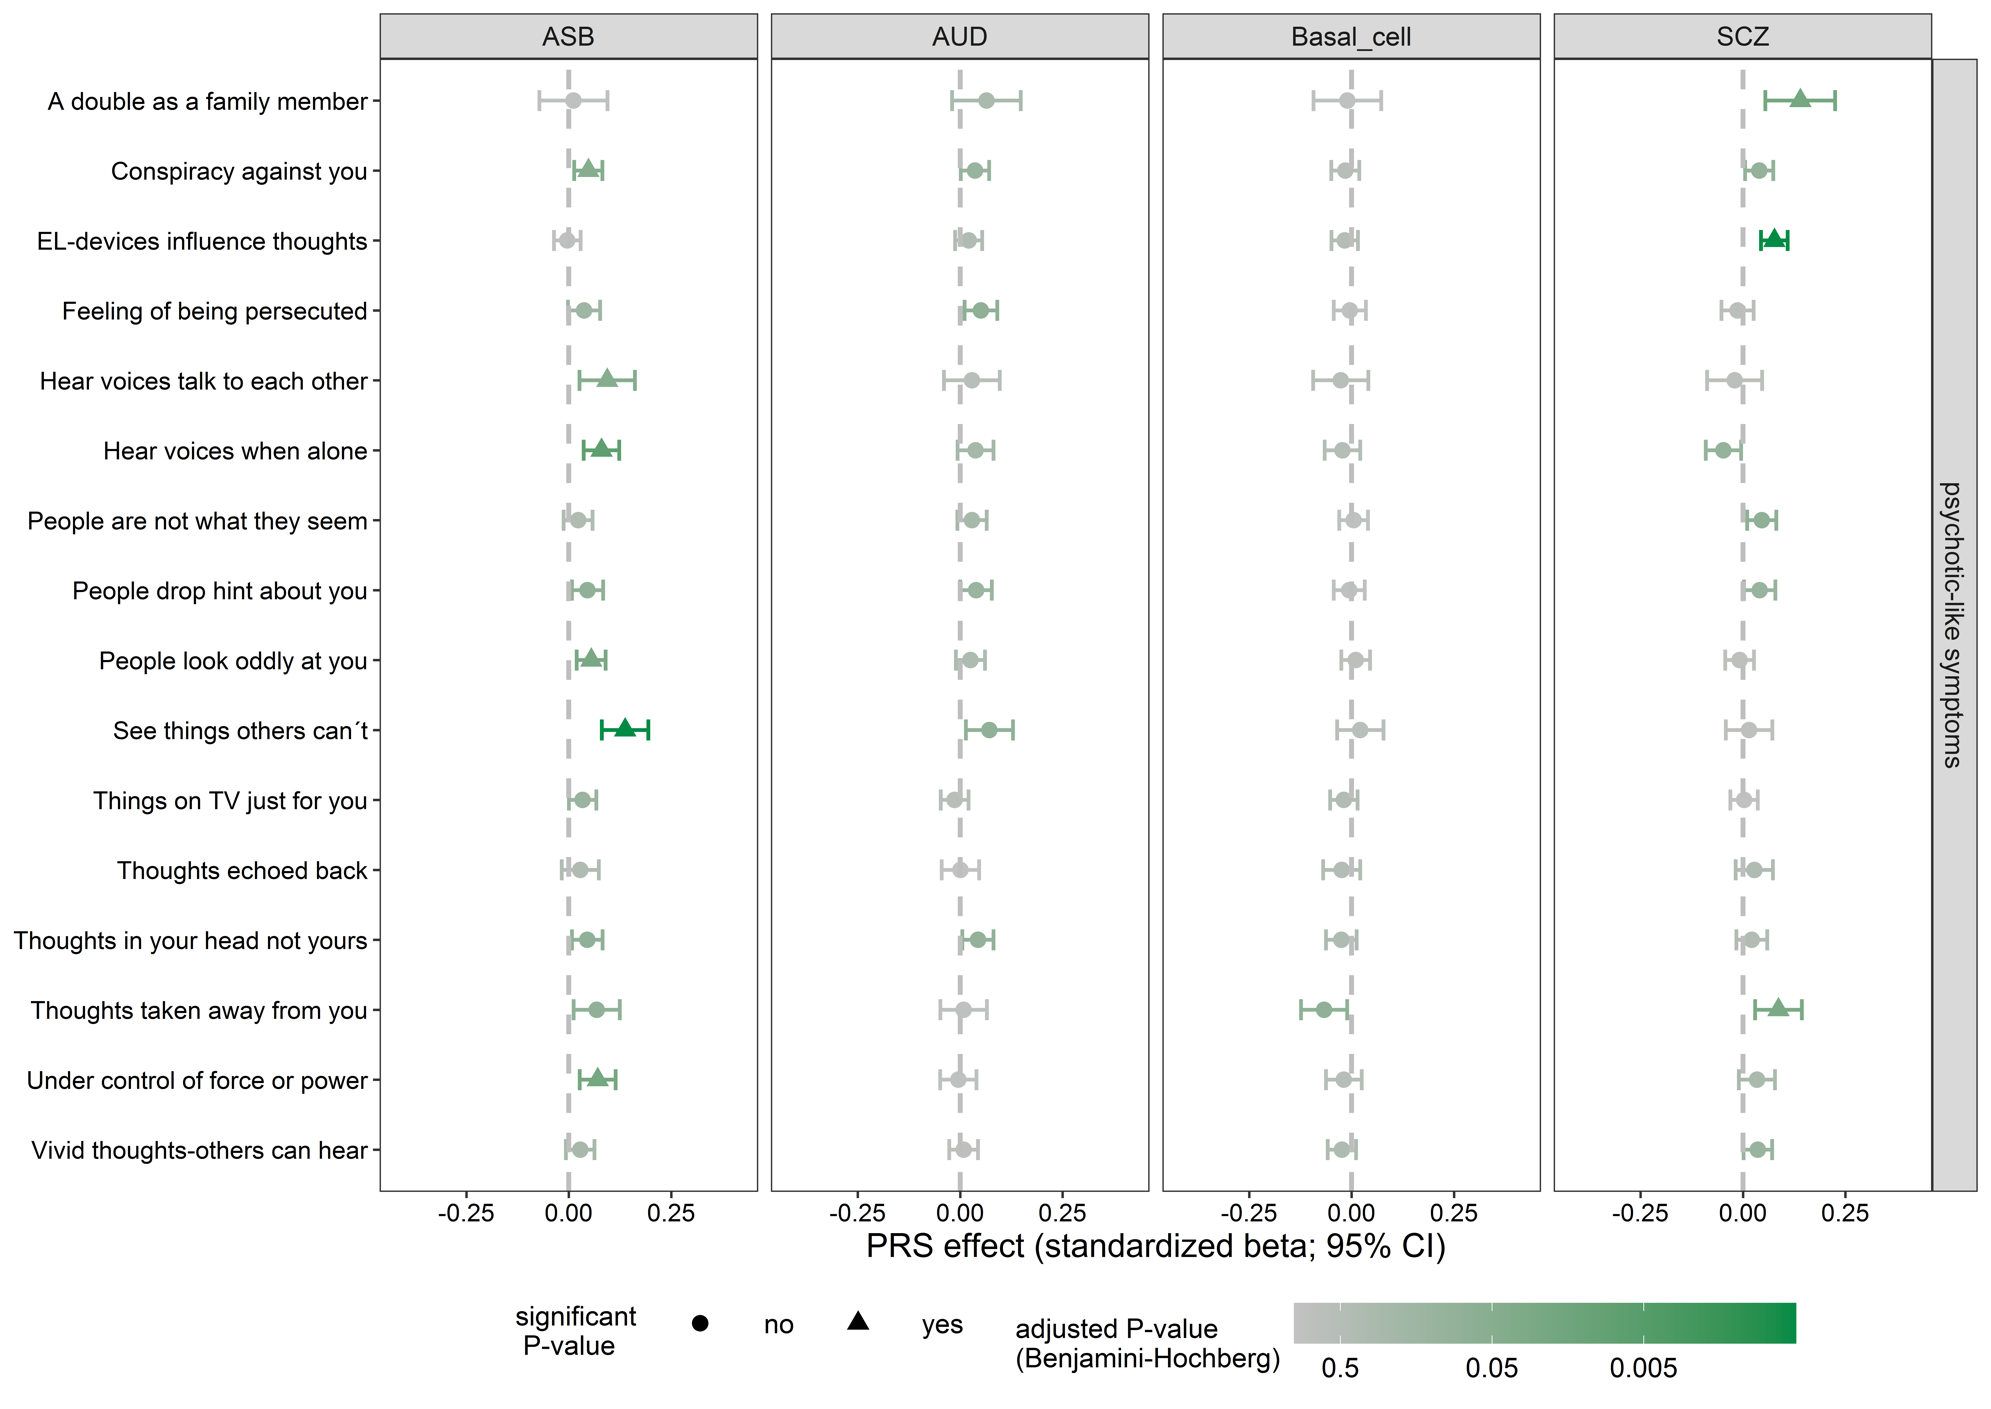


**Figure 4.** Logistic regression models for the associations between psychotic-like experiences (CAPE-16); and polygenic risk scores. ASB antisocial behaviour; SCZ schizophrenia; AUD alcohol use disorder; PRS polygenic risk score. Error bars represent the 95% CI of the estimate value. The vertical line represents an effect estimate equal to zero. The models included sex and the 10 first PCs as covariates. All *p*-values corrected with FDR for multiple testing.

## **Table 3. Psychotic-like experiences.**

| Item | Question | PRS | *β*-value | CI lower | CI upper | p-value |
| --- | --- | --- | --- | --- | --- | --- |
| UB252 | Things on TV just for you | SCZ | 0.003 | -0.031 | 0.036 | 0.8911 |
| UB254 | Feeling of being persecuted | SCZ | -0.013 | -0.052 | 0.026 | 0.6639 |
| UB256 | Conspiracy against you | SCZ | 0.040 | 0.005 | 0.074 | 0.0893 |
| UB258 | EL-devices influence thoughts | SCZ | 0.077 | 0.044 | 0.109 | 0.0001 |
| UB260 | Thoughts in your head not yours | SCZ | 0.021 | -0.016 | 0.059 | 0.4361 |
| UB262 | Vivid thoughts-others can hear | SCZ | 0.036 | 0.001 | 0.071 | 0.1233 |
| UB264 | Under control of force or power | SCZ | 0.034 | -0.010 | 0.078 | 0.2843 |
| UB266 | Hear voices when alone | SCZ | -0.048 | -0.091 | -0.005 | 0.1008 |
| UB268 | See things others can’t | SCZ | 0.015 | -0.042 | 0.071 | 0.7533 |
| UB270 | People drop hint about you | SCZ | 0.041 | 0.002 | 0.079 | 0.1194 |
| UB272 | People are not what they seem | SCZ | 0.046 | 0.010 | 0.081 | 0.0727 |
| UB274 | People look oddly at you | SCZ | -0.008 | -0.043 | 0.027 | 0.7648 |
| UB276 | Thoughts taken away from you | SCZ | 0.086 | 0.029 | 0.144 | 0.0273 |
| UB278 | Thoughts echoed back | SCZ | 0.028 | -0.018 | 0.073 | 0.4027 |
| UB280 | Hear voices talk to each other | SCZ | -0.020 | -0.087 | 0.047 | 0.7093 |
| UB282 | A double as a family member | SCZ | 0.140 | 0.055 | 0.225 | 0.0201 |
| Item | Question | PRS | *β*-value | CI lower | CI upper | p-value |
| UB252 | Things on TV just for you | ASB | 0.034 | 0.000 | 0.067 | 0.1293 |
| UB254 | Feeling of being persecuted | ASB | 0.037 | -0.002 | 0.076 | 0.1589 |
| UB256 | Conspiracy against you | ASB | 0.048 | 0.014 | 0.082 | 0.0460 |
| UB258 | EL-devices influence thoughts | ASB | -0.004 | -0.036 | 0.029 | 0.8669 |
| UB260 | Thoughts in your head not yours | ASB | 0.045 | 0.008 | 0.083 | 0.0796 |
| UB262 | Vivid thoughts-others can hear | ASB | 0.028 | -0.007 | 0.063 | 0.2644 |
| UB264 | Under control of force or power | ASB | 0.071 | 0.027 | 0.114 | 0.0201 |
| UB266 | Hear voices when alone | ASB | 0.080 | 0.036 | 0.123 | 0.0070 |
| UB268 | See things others can’t | ASB | 0.138 | 0.081 | 0.194 | 0.0001 |
| UB270 | People drop hint about you | ASB | 0.046 | 0.008 | 0.084 | 0.0796 |
| UB272 | People are not what they seem | ASB | 0.023 | -0.013 | 0.058 | 0.3865 |
| UB274 | People look oddly at you | ASB | 0.055 | 0.019 | 0.090 | 0.0247 |
| UB276 | Thoughts taken away from you | ASB | 0.068 | 0.012 | 0.125 | 0.0796 |
| UB278 | Thoughts echoed back | ASB | 0.028 | -0.017 | 0.073 | 0.3964 |
| UB280 | Hear voices talk to each other | ASB | 0.094 | 0.026 | 0.161 | 0.0460 |
| UB282 | A double as a family member | ASB | 0.011 | -0.072 | 0.094 | 0.8669 |
| Item | Question | PRS | *β*-value | CI lower | CI upper | p-value |
| UB252 | Things on TV just for you | AUD | -0.014 | -0.047 | 0.020 | 0.5990 |
| UB254 | Feeling of being persecuted | AUD | 0.051 | 0.011 | 0.090 | 0.0745 |
| UB256 | Conspiracy against you | AUD | 0.036 | 0.001 | 0.071 | 0.1233 |
| UB258 | EL-devices influence thoughts | AUD | 0.021 | -0.012 | 0.054 | 0.3960 |
| UB260 | Thoughts in your head not yours | AUD | 0.043 | 0.005 | 0.081 | 0.0904 |
| UB262 | Vivid thoughts-others can hear | AUD | 0.008 | -0.027 | 0.044 | 0.7648 |
| UB264 | Under control of force or power | AUD | -0.004 | -0.049 | 0.040 | 0.8734 |
| UB266 | Hear voices when alone | AUD | 0.038 | -0.006 | 0.082 | 0.2334 |
| UB268 | See things others can’t | AUD | 0.071 | 0.014 | 0.129 | 0.0777 |
| UB270 | People drop hint about you | AUD | 0.039 | 0.000 | 0.077 | 0.1293 |
| UB272 | People are not what they seem | AUD | 0.029 | -0.007 | 0.065 | 0.2644 |
| UB274 | People look oddly at you | AUD | 0.025 | -0.010 | 0.060 | 0.3403 |
| UB276 | Thoughts taken away from you | AUD | 0.008 | -0.049 | 0.065 | 0.8669 |
| UB278 | Thoughts echoed back | AUD | 0.001 | -0.045 | 0.046 | 0.9774 |
| UB280 | Hear voices talk to each other | AUD | 0.029 | -0.039 | 0.097 | 0.5835 |
| UB282 | A double as a family member | AUD | 0.064 | -0.020 | 0.148 | 0.2843 |
| Item | Question | PRS | *β*-value | CI lower | CI upper | p-value |
| UB252 | Things on TV just for you | Bcell | -0.019 | -0.052 | 0.014 | 0.4361 |
| UB254 | Feeling of being persecuted | Bcell | -0.004 | -0.044 | 0.035 | 0.8669 |
| UB256 | Conspiracy against you | Bcell | -0.016 | -0.050 | 0.019 | 0.5554 |
| UB258 | EL-devices influence thoughts | Bcell | -0.017 | -0.049 | 0.016 | 0.4828 |
| UB260 | Thoughts in your head not yours | Bcell | -0.025 | -0.063 | 0.012 | 0.3641 |
| UB262 | Vivid thoughts-others can hear | Bcell | -0.024 | -0.059 | 0.011 | 0.3582 |
| UB264 | Under control of force or power | Bcell | -0.019 | -0.063 | 0.025 | 0.5750 |
| UB266 | Hear voices when alone | Bcell | -0.022 | -0.066 | 0.021 | 0.4828 |
| UB268 | See things others can’t | Bcell | 0.021 | -0.035 | 0.078 | 0.6135 |
| UB270 | People drop hint about you | Bcell | -0.006 | -0.044 | 0.032 | 0.8669 |
| UB272 | People are not what they seem | Bcell | 0.005 | -0.030 | 0.040 | 0.8669 |
| UB274 | People look oddly at you | Bcell | 0.010 | -0.025 | 0.045 | 0.7218 |
| UB276 | Thoughts taken away from you | Bcell | -0.067 | -0.123 | -0.011 | 0.0796 |
| UB278 | Thoughts echoed back | Bcell | -0.024 | -0.069 | 0.021 | 0.4729 |
| UB280 | Hear voices talk to each other | Bcell | -0.026 | -0.094 | 0.041 | 0.5990 |
| UB282 | A double as a family member | Bcell | -0.010 | -0.093 | 0.072 | 0.8669 |

**Table 3**. Logistic regression models for the associations between psychotic-like experiences (CAPE-16); and polygenic risk scores. ASB antisocial behaviour; SCZ schizophrenia; AUD alcohol use disorder; PRS polygenic risk score. The models included sex and the 10 first PCs as covariates. All *p*-values corrected with FDR for multiple testing.

## **Figure 5. Psychopathy traits.**


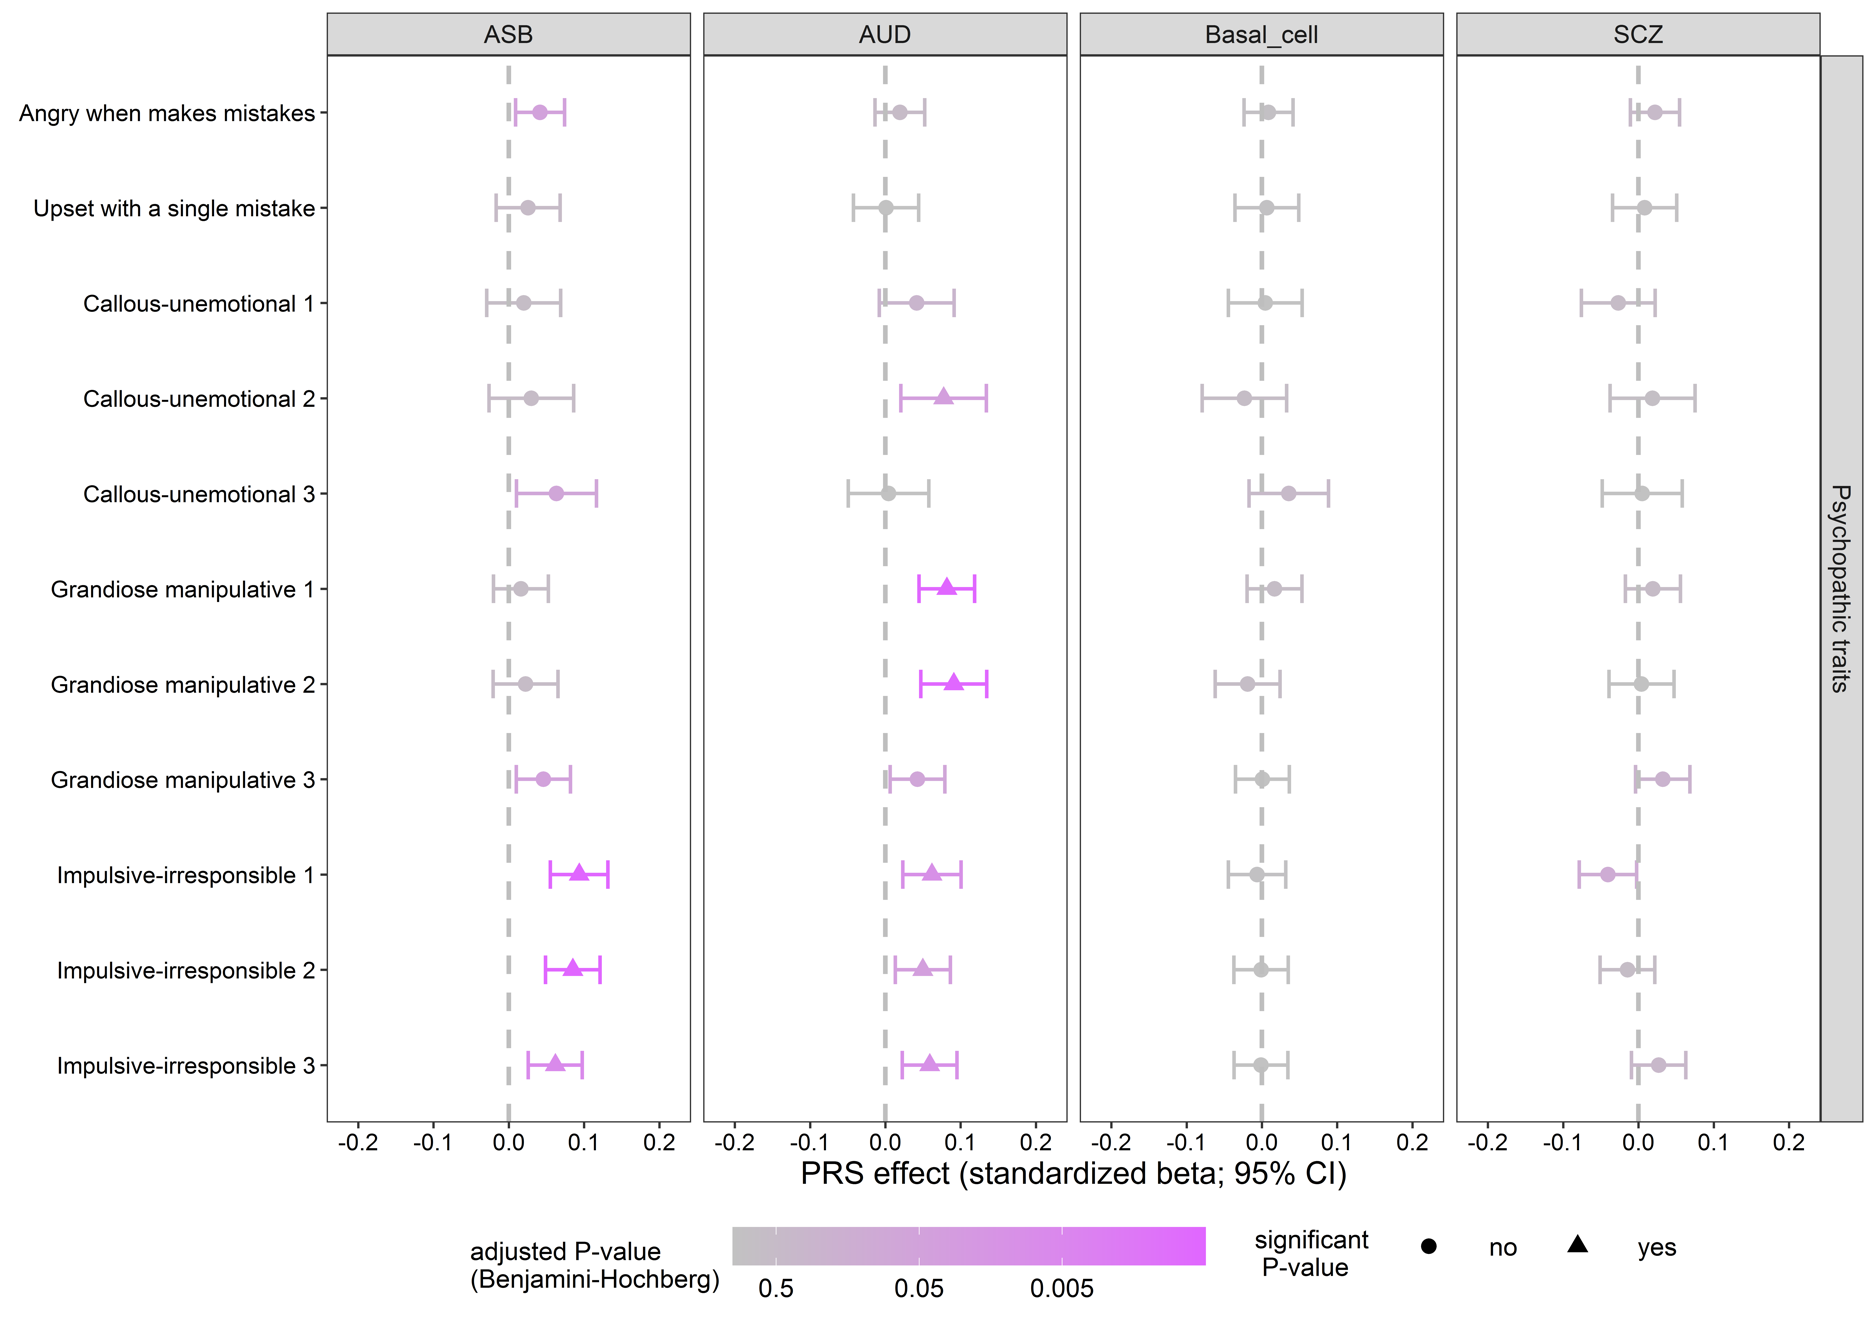


**Figure 5.** Logistic regression models for the associations between psychopathy traits (YPI-CV) and polygenic risk scores. Each 3 items correspond to the 3 dimensions of psychopathy (callous-unemotional, grandiose-manipulative, impulsive-irresponsible) with additional 2 items from Child and Adolescent perfection scale. ASB antisocial behaviour; SCZ schizophrenia; AUD alcohol use disorder; PRS polygenic risk score. Error bars represent the 95% CI of the estimate value. The vertical line represents an effect estimate equal to zero. The models included sex and the 10 first PCs as covariates. All *p*-values corrected with FDR for multiple testing.

## **Table 4. Psychopathy traits.**

| Item | Question | PRS | *β*-value | CI lower | CI upper | p-value |
| --- | --- | --- | --- | --- | --- | --- |
| UB155 | Grandiose manipulative 1 | SCZ | 0.019 | -0.017 | 0.056 | 0.5485 |
| UB156 | Grandiose manipulative 2 | SCZ | 0.004 | -0.039 | 0.047 | 0.9607 |
| UB157 | Grandiose manipulative 3 | SCZ | 0.032 | -0.004 | 0.068 | 0.2316 |
| UB158 | Callous-unemotional 1 | SCZ | -0.027 | -0.076 | 0.022 | 0.5485 |
| UB159 | Callous-unemotional 2 | SCZ | 0.019 | -0.038 | 0.075 | 0.7084 |
| UB160 | Callous-unemotional 3 | SCZ | 0.005 | -0.048 | 0.058 | 0.9607 |
| UB161 | Impulsive-irresponsible 1 | SCZ | -0.041 | -0.079 | -0.002 | 0.1178 |
| UB162 | Impulsive-irresponsible 2 | SCZ | -0.015 | -0.051 | 0.022 | 0.6117 |
| UB163 | Impulsive-irresponsible 3 | SCZ | 0.027 | -0.009 | 0.063 | 0.3725 |
| UB164 | Angry when makes mistakes | SCZ | 0.022 | -0.011 | 0.055 | 0.4358 |
| UB165 | Upset with a single mistake | SCZ | 0.008 | -0.034 | 0.051 | 0.9132 |
| Item | Question | PRS | *β*-value | CI lower | CI upper | p-value |
| UB155 | Grandiose manipulative 1 | ASB | 0.016 | -0.020 | 0.053 | 0.6080 |
| UB156 | Grandiose manipulative 2 | ASB | 0.022 | -0.021 | 0.065 | 0.5485 |
| UB157 | Grandiose manipulative 3 | ASB | 0.046 | 0.010 | 0.082 | 0.0504 |
| UB158 | Callous-unemotional 1 | ASB | 0.020 | -0.029 | 0.069 | 0.6117 |
| UB159 | Callous-unemotional 2 | ASB | 0.030 | -0.026 | 0.086 | 0.5485 |
| UB160 | Callous-unemotional 3 | ASB | 0.063 | 0.010 | 0.116 | 0.0711 |
| UB161 | Impulsive-irresponsible 1 | ASB | 0.093 | 0.055 | 0.132 | 7.6×10-5 |
| UB162 | Impulsive-irresponsible 2 | ASB | 0.085 | 0.049 | 0.121 | 9.4×10-5 |
| UB163 | Impulsive-irresponsible 3 | ASB | 0.062 | 0.026 | 0.098 | 0.0065 |
| UB164 | Angry when makes mistakes | ASB | 0.042 | 0.009 | 0.074 | 0.0504 |
| UB165 | Upset with a single mistake | ASB | 0.026 | -0.017 | 0.068 | 0.5227 |
| Item | Question-item | PRS | *β*-value | CI lower | CI upper | p-value |
| UB155 | Grandiose manipulative 1 | AUD | 0.082 | 0.045 | 0.119 | 0.0002 |
| UB156 | Grandiose manipulative 2 | AUD | 0.091 | 0.047 | 0.135 | 0.0005 |
| UB157 | Grandiose manipulative 3 | AUD | 0.043 | 0.006 | 0.079 | 0.0721 |
| UB158 | Callous-unemotional 1 | AUD | 0.042 | -0.008 | 0.091 | 0.2747 |
| UB159 | Callous-unemotional 2 | AUD | 0.077 | 0.021 | 0.134 | 0.0377 |
| UB160 | Callous-unemotional 3 | AUD | 0.004 | -0.049 | 0.058 | 0.9607 |
| UB161 | Impulsive-irresponsible 1 | AUD | 0.062 | 0.023 | 0.101 | 0.0108 |
| UB162 | Impulsive-irresponsible 2 | AUD | 0.050 | 0.013 | 0.086 | 0.0377 |
| UB163 | Impulsive-irresponsible 3 | AUD | 0.059 | 0.023 | 0.095 | 0.0108 |
| UB164 | Angry when makes mistakes | AUD | 0.019 | -0.014 | 0.052 | 0.5274 |
| UB165 | Upset with a single mistake | AUD | 0.001 | -0.042 | 0.044 | 0.9701 |
| Item | Question-item | PRS | *β*-value | CI lower | CI upper | p-value |
| UB155 | Grandiose manipulative 1 | Bcell | 0.017 | -0.020 | 0.053 | 0.6080 |
| UB156 | Grandiose manipulative 2 | Bcell | -0.019 | -0.062 | 0.024 | 0.6080 |
| UB157 | Grandiose manipulative 3 | Bcell | 0.001 | -0.035 | 0.036 | 0.9701 |
| UB158 | Callous-unemotional 1 | Bcell | 0.004 | -0.044 | 0.053 | 0.9607 |
| UB159 | Callous-unemotional 2 | Bcell | -0.023 | -0.079 | 0.033 | 0.6117 |
| UB160 | Callous-unemotional 3 | Bcell | 0.036 | -0.017 | 0.088 | 0.4358 |
| UB161 | Impulsive-irresponsible 1 | Bcell | -0.006 | -0.045 | 0.032 | 0.9288 |
| UB162 | Impulsive-irresponsible 2 | Bcell | -0.001 | -0.037 | 0.035 | 0.9701 |
| UB163 | Impulsive-irresponsible 3 | Bcell | -0.001 | -0.037 | 0.035 | 0.9701 |
| UB164 | Angry when makes mistakes | Bcell | 0.009 | -0.024 | 0.041 | 0.7935 |
| UB165 | Upset with a single mistake | Bcell | 0.007 | -0.036 | 0.049 | 0.9288 |

**Table 4.** Logistic regression models for the associations between psychopathy traits (YPI-CV) and polygenic risk scores. Each 3 items correspond to the 3 dimensions of psychopathy (callous-unemotional, grandiose-manipulative, impulsive-irresponsible) with additional 2 items from Child and Adolescent perfection scale. ASB antisocial behaviour; SCZ schizophrenia; AUD alcohol use disorder; PRS polygenic risk score. The models included sex and the 10 first PCs as covariates. All *p*-values corrected with FDR for multiple testing.

## **Figure 6. Conduct disorder traits.**


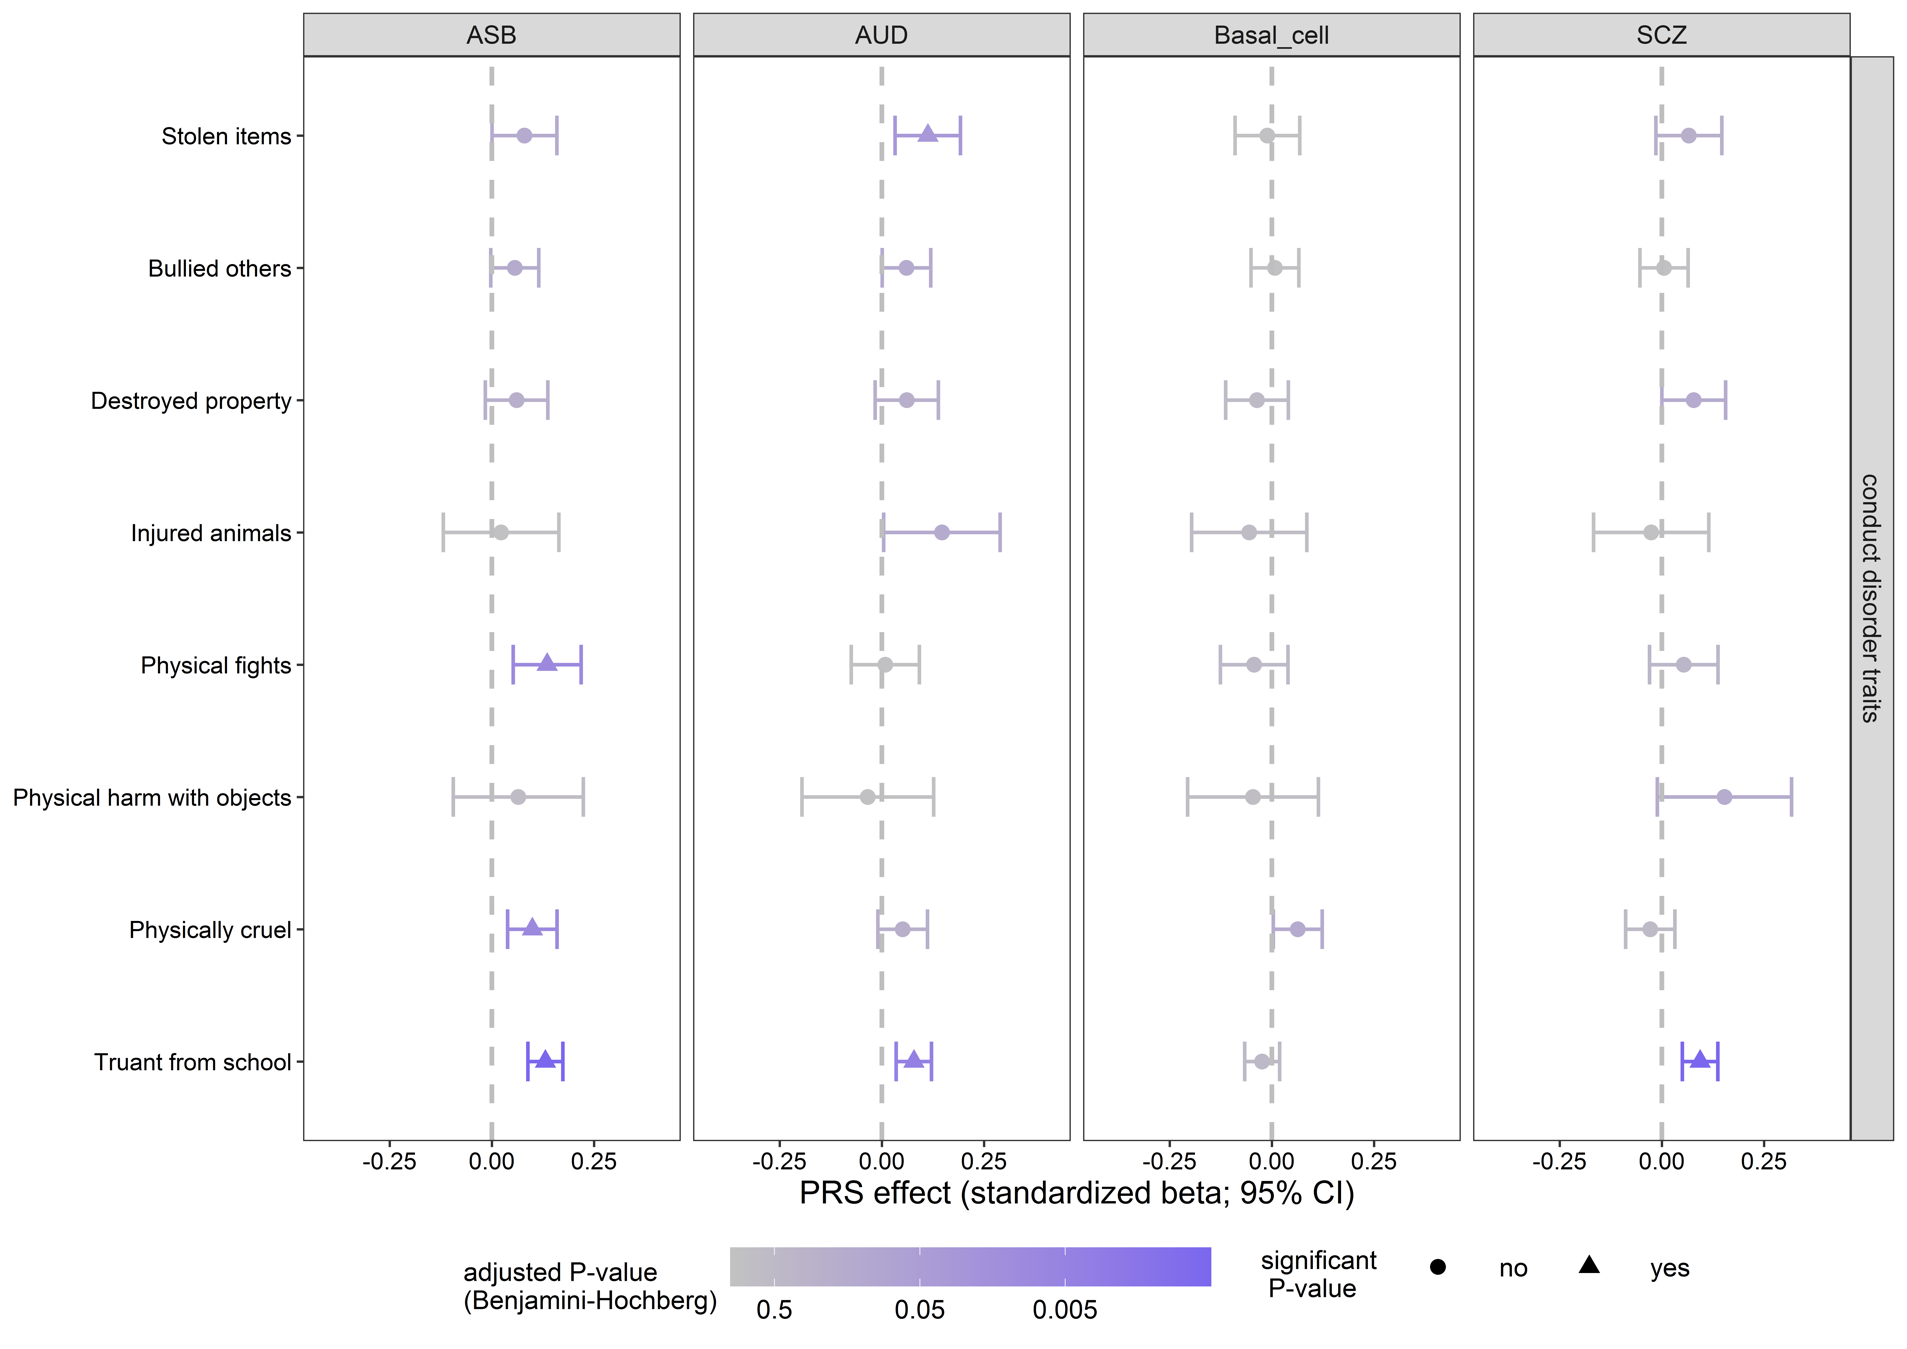


**Figure 6.** Logistic regression models for the associations between conduct disorder traits (RS-DBD); and polygenic risk scores. ASB antisocial behaviour; SCZ schizophrenia; AUD alcohol use disorder; PRS polygenic risk score. Error bars represent the 95% CI of the estimate value. The vertical line represents an effect estimate equal to zero. The models included sex and the 10 first PCs as covariates. All *p*-values corrected with FDR for multiple testing.

## **Table 5. Conduct disorder traits.**

| Item | Question | PRS | *β*-value | CI lower | CI upper | p-value |
| --- | --- | --- | --- | --- | --- | --- |
| UB127 | Bullied others | SCZ | 0.005 | -0.054 | 0.064 | 0.8573 |
| UB128 | Physical fights | SCZ | 0.054 | -0.030 | 0.137 | 0.3715 |
| UB129 | Physically cruel | SCZ | -0.029 | -0.089 | 0.032 | 0.5146 |
| UB130 | Injured animals | SCZ | -0.026 | -0.167 | 0.115 | 0.8498 |
| UB131 | Stolen items | SCZ | 0.066 | -0.015 | 0.147 | 0.2288 |
| UB132 | Destroyed property | SCZ | 0.078 | 0.000 | 0.156 | 0.1451 |
| UB133 | Truant from school | SCZ | 0.093 | 0.050 | 0.137 | 0.0004 |
| UB134 | Physical harm with objects | SCZ | 0.153 | -0.011 | 0.318 | 0.1673 |
| Item | Question | PRS | *β*-value | CI lower | CI upper | p-value |
| UB127 | Bullied others | ASB | 0.056 | -0.002 | 0.115 | 0.1605 |
| UB128 | Physical fights | ASB | 0.135 | 0.052 | 0.218 | 0.0089 |
| UB129 | Physically cruel | ASB | 0.099 | 0.039 | 0.160 | 0.0089 |
| UB130 | Injured animals | ASB | 0.023 | -0.119 | 0.164 | 0.8558 |
| UB131 | Stolen items | ASB | 0.080 | 0.001 | 0.159 | 0.1451 |
| UB132 | Destroyed property | ASB | 0.061 | -0.016 | 0.137 | 0.2288 |
| UB133 | Truant from school | ASB | 0.131 | 0.088 | 0.174 | 6 ×10-8 |
| UB134 | Physical harm with objects | ASB | 0.065 | -0.094 | 0.224 | 0.5877 |
| Item | Question | PRS | *β*-value | CI lower | CI upper | p-value |
| UB127 | Bullied others | AUD | 0.060 | 0.001 | 0.119 | 0.1451 |
| UB128 | Physical fights | AUD | 0.008 | -0.075 | 0.092 | 0.8573 |
| UB129 | Physically cruel | AUD | 0.051 | -0.010 | 0.112 | 0.2288 |
| UB130 | Injured animals | AUD | 0.147 | 0.005 | 0.290 | 0.1451 |
| UB131 | Stolen items | AUD | 0.112 | 0.032 | 0.192 | 0.0312 |
| UB132 | Destroyed property | AUD | 0.061 | -0.016 | 0.138 | 0.2288 |
| UB133 | Truant from school | AUD | 0.078 | 0.035 | 0.121 | 0.0040 |
| UB134 | Physical harm with objects | AUD | -0.034 | -0.195 | 0.127 | 0.8310 |
| Item | Question | PRS | *β*-value | CI lower | CI upper | p-value |
| UB127 | Bullied others | Bcell | 0.007 | -0.051 | 0.066 | 0.8558 |
| UB128 | Physical fights | Bcell | -0.043 | -0.126 | 0.039 | 0.4864 |
| UB129 | Physically cruel | Bcell | 0.063 | 0.003 | 0.123 | 0.1451 |
| UB130 | Injured animals | Bcell | -0.055 | -0.197 | 0.086 | 0.5877 |
| UB131 | Stolen items | Bcell | -0.011 | -0.090 | 0.068 | 0.8558 |
| UB132 | Destroyed property | Bcell | -0.036 | -0.113 | 0.040 | 0.5146 |
| UB133 | Truant from school | Bcell | -0.024 | -0.066 | 0.019 | 0.4616 |
| UB134 | Physical harm with objects | Bcell | -0.046 | -0.206 | 0.114 | 0.7307 |

**Table 5.** Logistic regression models for the associations between conduct disorder traits (RS-DBD); and polygenic risk scores. ASB antisocial behaviour; SCZ schizophrenia; AUD alcohol use disorder; PRS polygenic risk score. The models included sex and the 10 first PCs as covariates. All *p*-values corrected with FDR for multiple testing.

## **Figure 7. Oppositional-defiant disorder traits.**


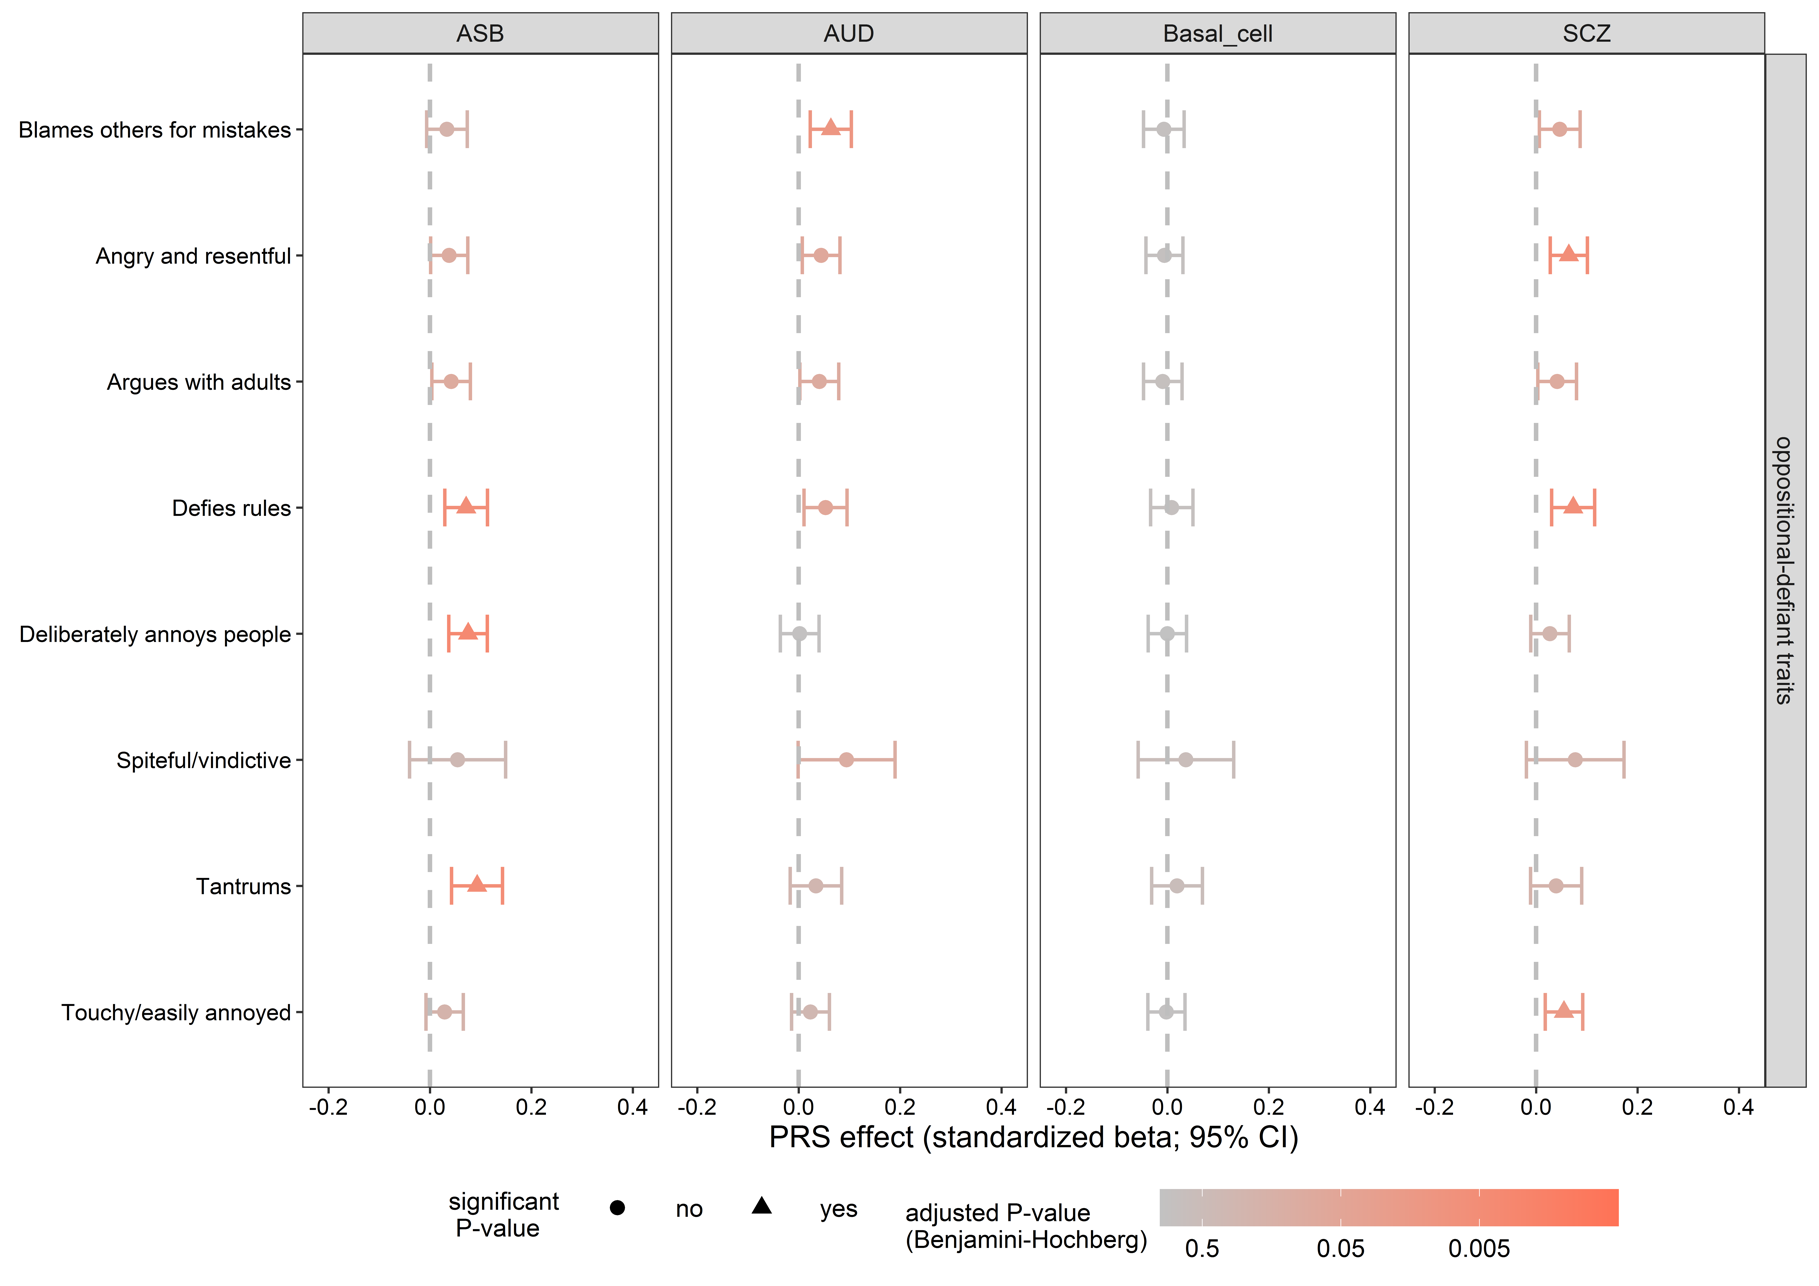


**Figure 7.** Logistic regression models for the associations between oppositional-defiant disorder traits (RS-DBD); and polygenic risk scores. ASB antisocial behaviour; SCZ schizophrenia; AUD alcohol use disorder; PRS polygenic risk score. Error bars represent the 95% CI of the estimate value. The vertical line represents an effect estimate equal to zero. The models included sex and the 10 first PCs as covariates. All *p*-values corrected with FDR for multiple testing.

## **Table 6. Oppositional-defiant disorder traits.**

| Item | Question | PRS | *β*-value | CI lower | CI upper | p-value |
| --- | --- | --- | --- | --- | --- | --- |
| UM170 | Tantrums | SCZ | 0.039 | -0.011 | 0.090 | 0.2123 |
| UM171 | Argues with adults | SCZ | 0.042 | 0.003 | 0.080 | 0.0867 |
| UM172 | Defies rules | SCZ | 0.073 | 0.031 | 0.115 | 0.0056 |
| UM173 | Deliberately annoys people | SCZ | 0.027 | -0.011 | 0.065 | 0.2540 |
| UM174 | Blames others for mistakes | SCZ | 0.047 | 0.006 | 0.087 | 0.0749 |
| UM175 | Touchy/easily annoyed | SCZ | 0.055 | 0.018 | 0.092 | 0.0162 |
| UM176 | Angry and resentful | SCZ | 0.064 | 0.028 | 0.101 | 0.0056 |
| UM177 | Spiteful/vindictive | SCZ | 0.077 | -0.019 | 0.174 | 0.2123 |
| Item | Question | PRS | *β*-value | CI lower | CI upper | p-value |
| UM170 | Tantrums | ASB | 0.093 | 0.043 | 0.143 | 0.0048 |
| UM171 | Argues with adults | ASB | 0.042 | 0.004 | 0.080 | 0.0867 |
| UM172 | Defies rules | ASB | 0.071 | 0.029 | 0.113 | 0.0056 |
| UM173 | Deliberately annoys people | ASB | 0.075 | 0.037 | 0.113 | 0.0034 |
| UM174 | Blames others for mistakes | ASB | 0.033 | -0.007 | 0.074 | 0.2034 |
| UM175 | Touchy/easily annoyed | ASB | 0.029 | -0.008 | 0.066 | 0.2123 |
| UM176 | Angry and resentful | ASB | 0.038 | 0.001 | 0.075 | 0.0961 |
| UM177 | Spiteful/vindictive | ASB | 0.054 | -0.040 | 0.149 | 0.3611 |
| Item | Question | PRS | *β*-value | CI lower | CI upper | p-value |
| UM170 | Tantrums | AUD | 0.034 | -0.017 | 0.085 | 0.2848 |
| UM171 | Argues with adults | AUD | 0.041 | 0.002 | 0.079 | 0.0929 |
| UM172 | Defies rules | AUD | 0.053 | 0.011 | 0.095 | 0.0574 |
| UM173 | Deliberately annoys people | AUD | 0.002 | -0.036 | 0.040 | 0.9472 |
| UM174 | Blames others for mistakes | AUD | 0.063 | 0.023 | 0.104 | 0.0114 |
| UM175 | Touchy/easily annoyed | AUD | 0.023 | -0.014 | 0.061 | 0.3195 |
| UM176 | Angry and resentful | AUD | 0.044 | 0.007 | 0.081 | 0.0687 |
| UM177 | Spiteful/vindictive | AUD | 0.094 | -0.001 | 0.190 | 0.1127 |
| Item | Question | PRS | *β*-value | CI lower | CI upper | p-value |
| UM170 | Tantrums | Bcell | 0.019 | -0.031 | 0.069 | 0.5845 |
| UM171 | Argues with adults | Bcell | -0.009 | -0.047 | 0.029 | 0.7849 |
| UM172 | Defies rules | Bcell | 0.009 | -0.033 | 0.050 | 0.8144 |
| UM173 | Deliberately annoys people | Bcell | 0.000 | -0.038 | 0.038 | 0.9956 |
| UM174 | Blames others for mistakes | Bcell | -0.007 | -0.047 | 0.033 | 0.8339 |
| UM175 | Touchy/easily annoyed | Bcell | -0.002 | -0.039 | 0.035 | 0.9472 |
| UM176 | Angry and resentful | Bcell | -0.006 | -0.042 | 0.031 | 0.8339 |
| UM177 | Spiteful/vindictive | Bcell | 0.037 | -0.058 | 0.131 | 0.5845 |

**Table 6.** Logistic regression models for the associations between oppositional-defiant disorder traits (RS-DBD); and polygenic risk scores. ASB antisocial behaviour; SCZ schizophrenia; AUD alcohol use disorder; PRS polygenic risk score. The models included sex and the 10 first PCs as covariates. All *p*-values corrected with FDR for multiple testing.

# **References:**

1. Corfield EC, Frei O, Shadrin AA, Rahman Z, Lin A, Athanasiu L, et al. The Norwegian Mother, Father, and Child cohort study (MoBa) genotyping data resource: MoBaPsychGen pipeline v.1. bioRxiv. 2022:2022.06.23.496289.

2. Pillinger T, Osimo EF, de Marvao A, Shah M, Francis C, Huang J, et al. Effect of polygenic risk for schizophrenia on cardiac structure and function: a UK Biobank observational study. Lancet Psychiatry. 2023;10(2):98-107.

3. Capra C, Kavanagh DJ, Hides L, Scott J. Brief screening for psychosis-like experiences. Schizophr Res. 2013;149(1-3):104-7.

4. Birkenæs V, Refsum Bakken N, Frei E, Jaholkowski P, Smeland OB, Tesfaye M, et al. Psychometric Properties and Diagnostic Associations of the Short-Form Community Assessment of Psychic Experiences in a Population-Based Sample of 29 021 Adult Men. Schizophrenia Bulletin. 2023;49(5):1229-38.

5. Birkenaes V, Parekh P, Hegemann L, Bakken NR, Frei E, Jaholkowski P, et al. Youth psychotic experiences: psychometric evaluation and diagnostic associations of the CAPE-16 in adolescents from the Norwegian Mother, Mather and Child Cohort. J Child Psychol Psychiatry. 2025.

6. van Baardewijk Y, Stegge H, Andershed H, Thomaes S, Scholte E, Vermeiren R. Measuring psychopathic traits in children through self-report. The development of the Youth Psychopathic Traits Inventory-Child Version. Int J Law Psychiatry. 2008;31(3):199-209.

7. Silva RR, Alpert M, Pouget E, Silva V, Trosper S, Reyes K, et al. A rating scale for disruptive behavior disorders, based on the DSM-IV item pool. Psychiatr Q. 2005;76(4):327-39.
